# Supplementary material for: Synthesis of Functional Building Blocks for Type III-B Rotaxane Dendrimer
Source: MDPI journal article supplement (doi:10.3390/polym13223909), 2021-11-12
Supplement: s1 [file s1]

# Electronic Supplementary Information

## Synthesis of Functional Building Blocks for Type III-B Rotaxane Dendrimer

Chak-Shing Kwan,<sup>1</sup> Watson K.-W. Ho,<sup>2</sup> Yanyan Chen,<sup>1</sup> Zongwei Cai,<sup>1</sup> Ken Cham-Fai

Leung\*<sup>1</sup>

<sup>1</sup> State Key Laboratory of Environmental and Biological Analysis, Department of Chemistry,  
The Hong Kong Baptist University, Kowloon Tong, Kowloon, P. R. China.

<sup>2</sup> Department of Chemistry, The Chinese University of Hong Kong, Shatin, NT, P. R. China.

E-mail: cfleung@hkbu.edu.hk

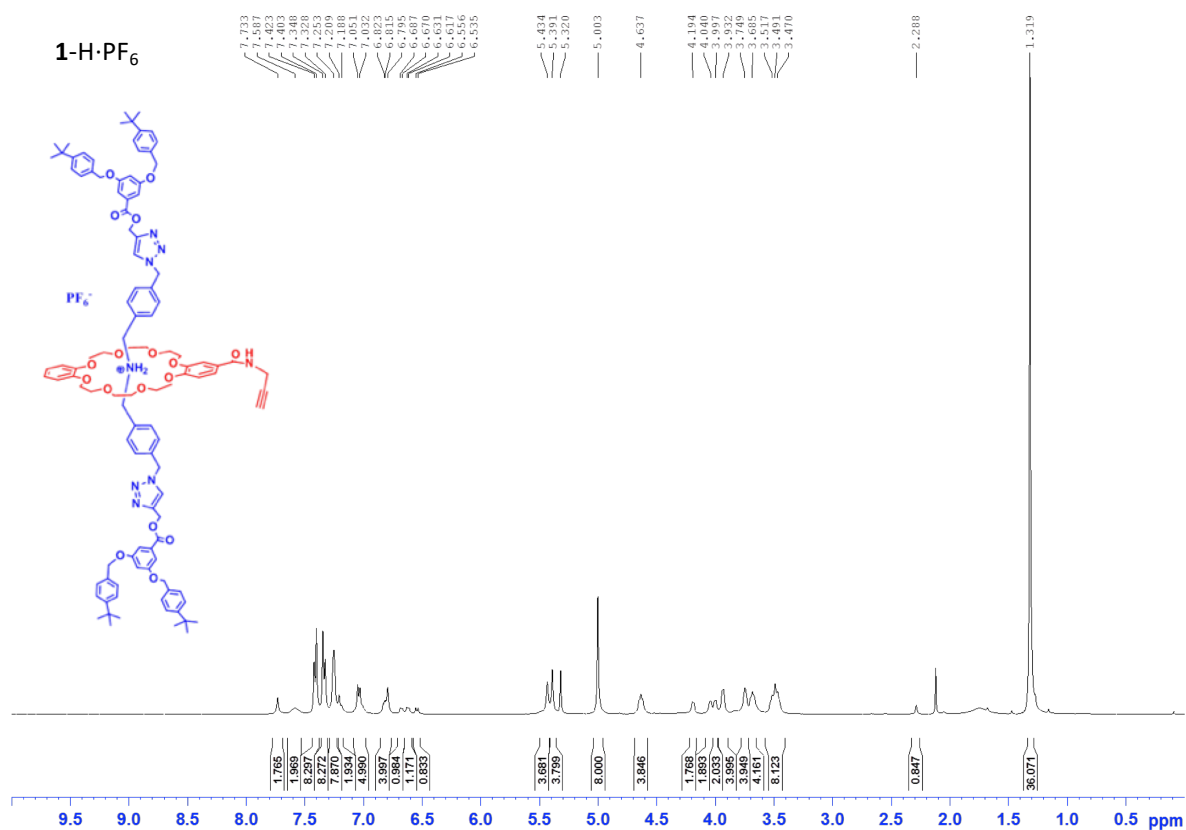

**Figure S1.** <sup>1</sup>H NMR spectrum of the G1 rotaxane dendron-acetylene **1-H·PF<sub>6</sub>**.

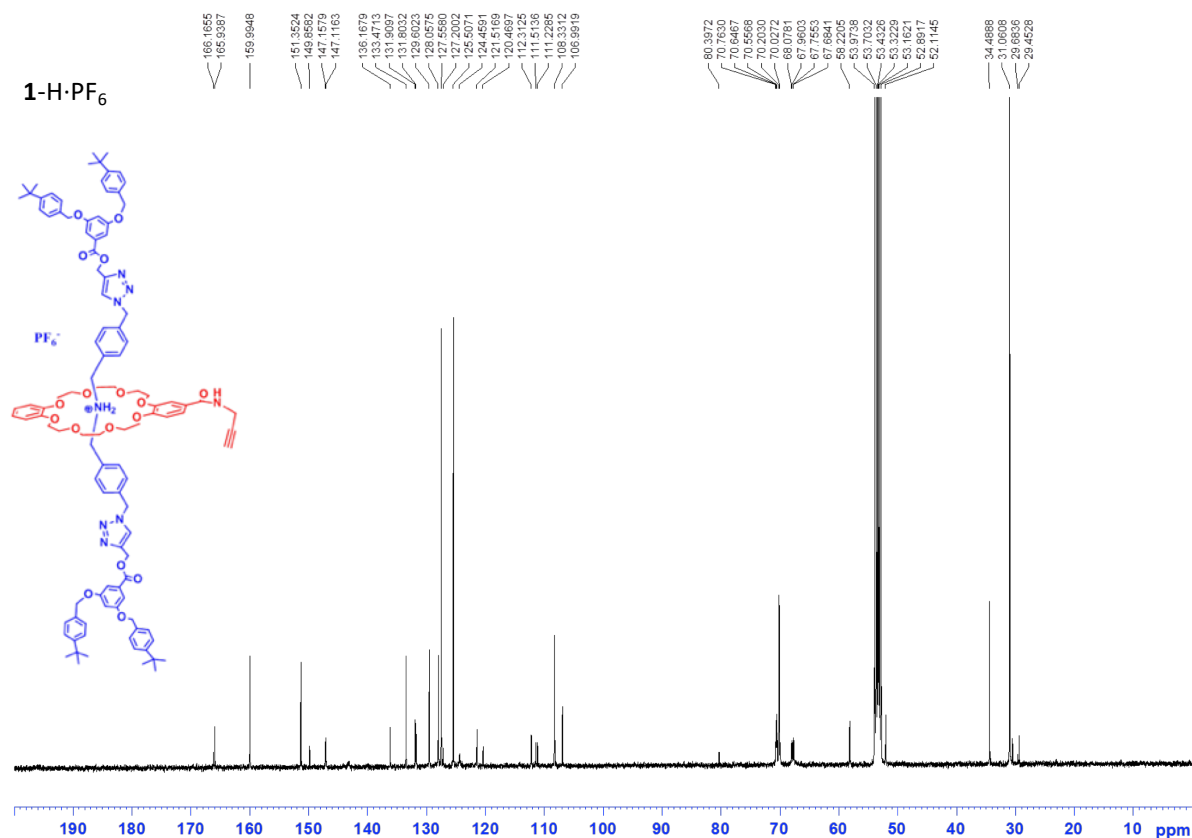

**Figure S2.** <sup>13</sup>C NMR spectrum of the G1 rotaxane dendron-acetylene **1-H·PF<sub>6</sub>**.

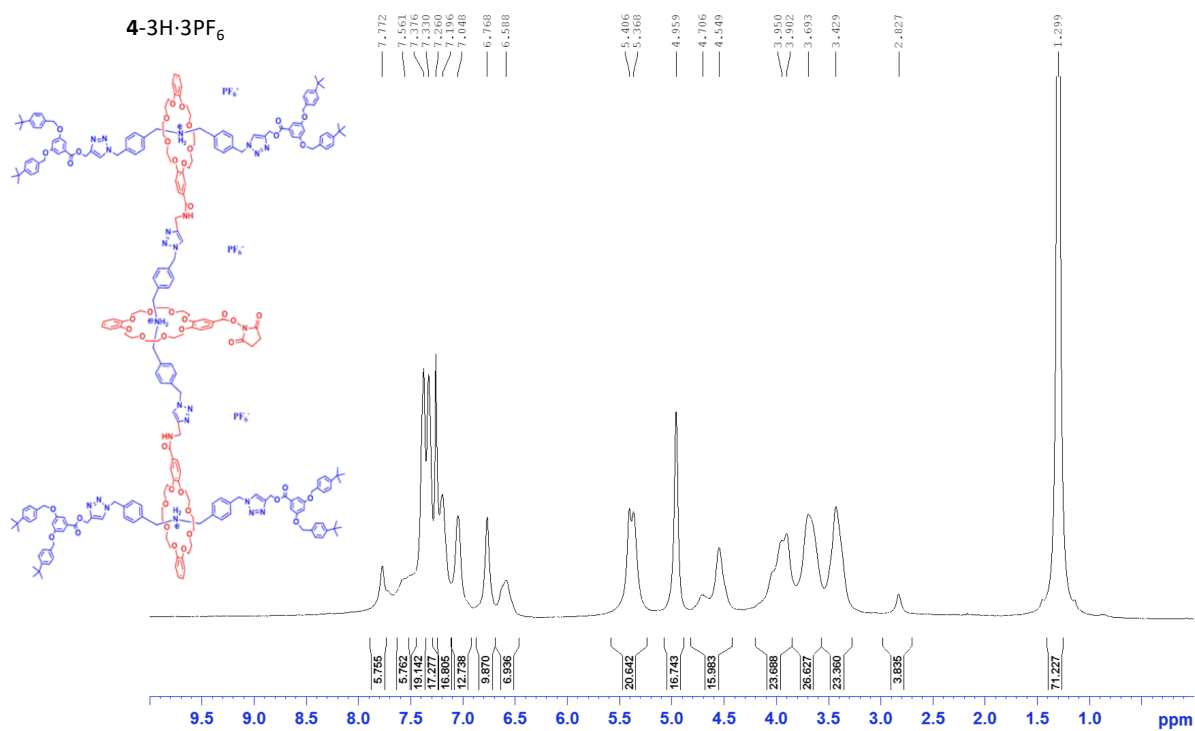

**Figure S3.** <sup>1</sup>H NMR spectrum of the G2 rotaxane dendron-OSu 4-3H·3PF<sub>6</sub>.

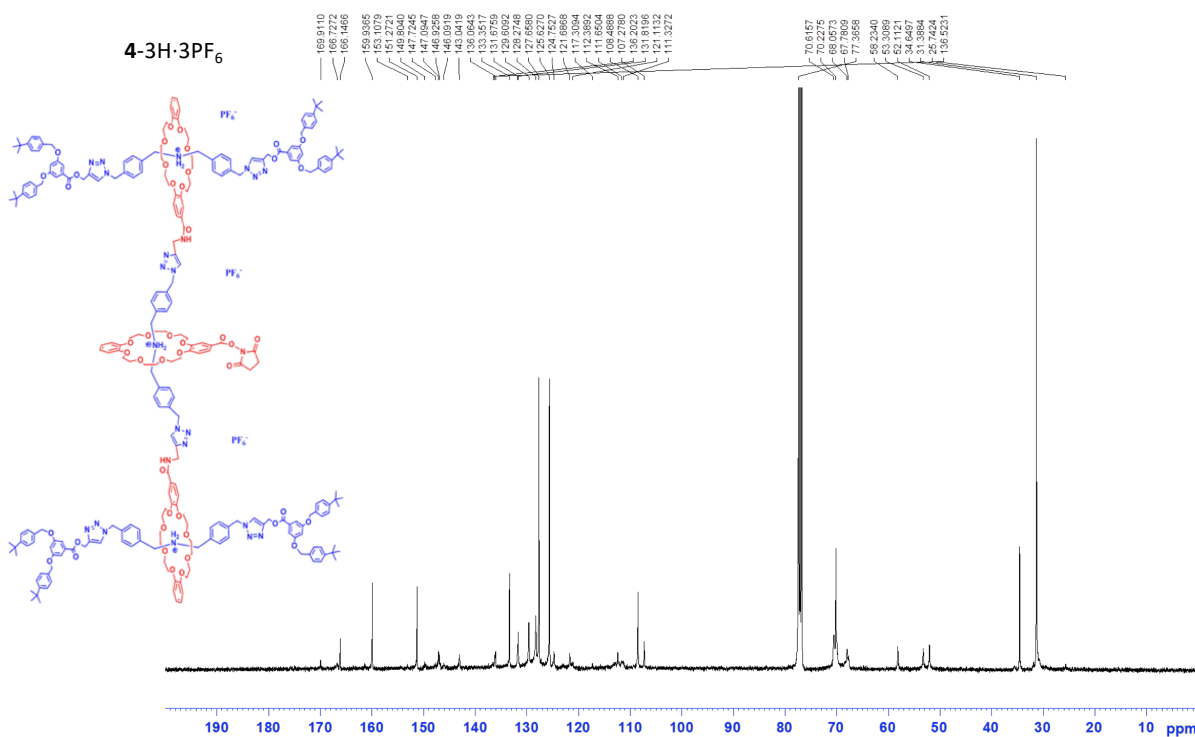

**Figure S4.** <sup>13</sup>C NMR spectrum of the G2 rotaxane dendron-OSu 4-3H·3PF<sub>6</sub>.

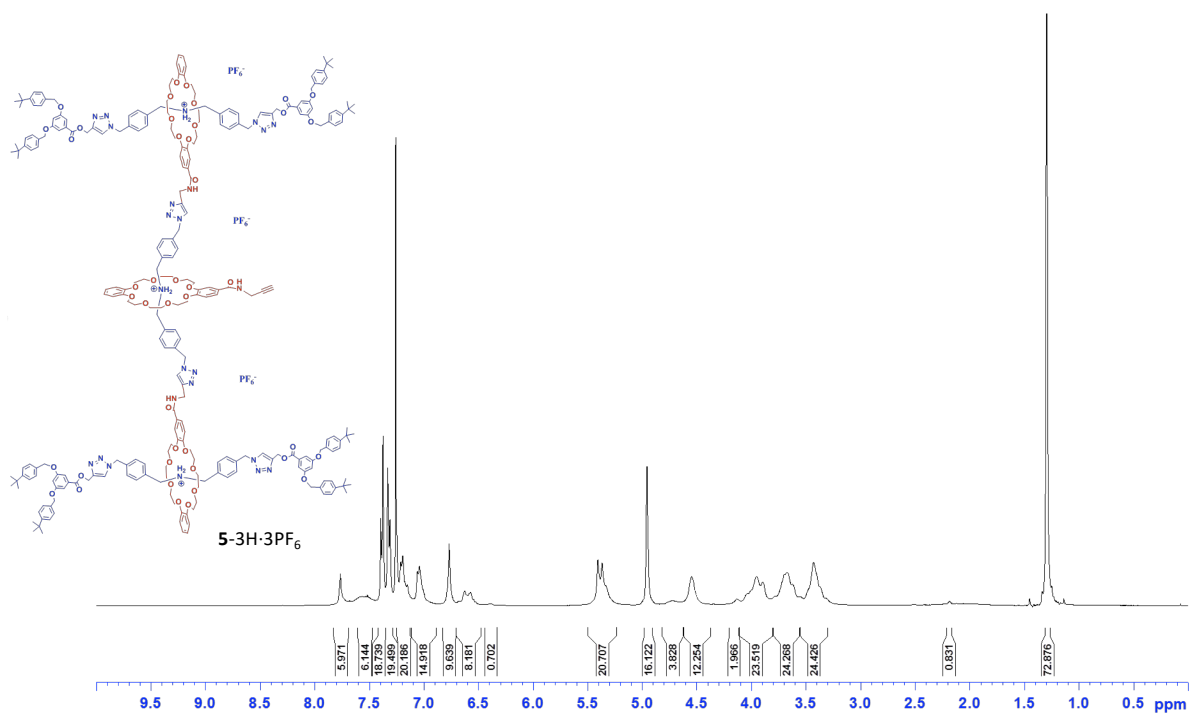

**Figure S5.**  $^1\text{H}$  NMR spectrum of the G2 rotaxane dendron-acetylene  $5\text{-}3\text{H}\cdot 3\text{PF}_6$ .

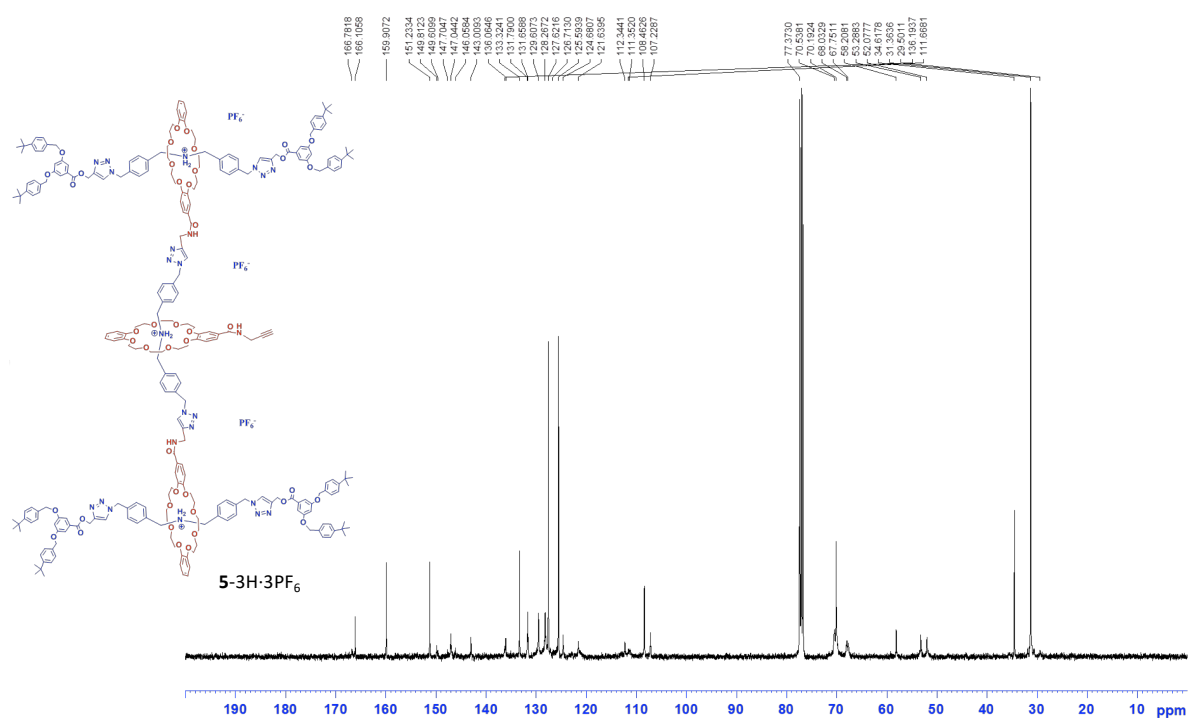

**Figure S6.**  $^{13}\text{C}$  NMR spectrum of the G2 rotaxane dendron-acetylene  $5\text{-}3\text{H}\cdot 3\text{PF}_6$ .

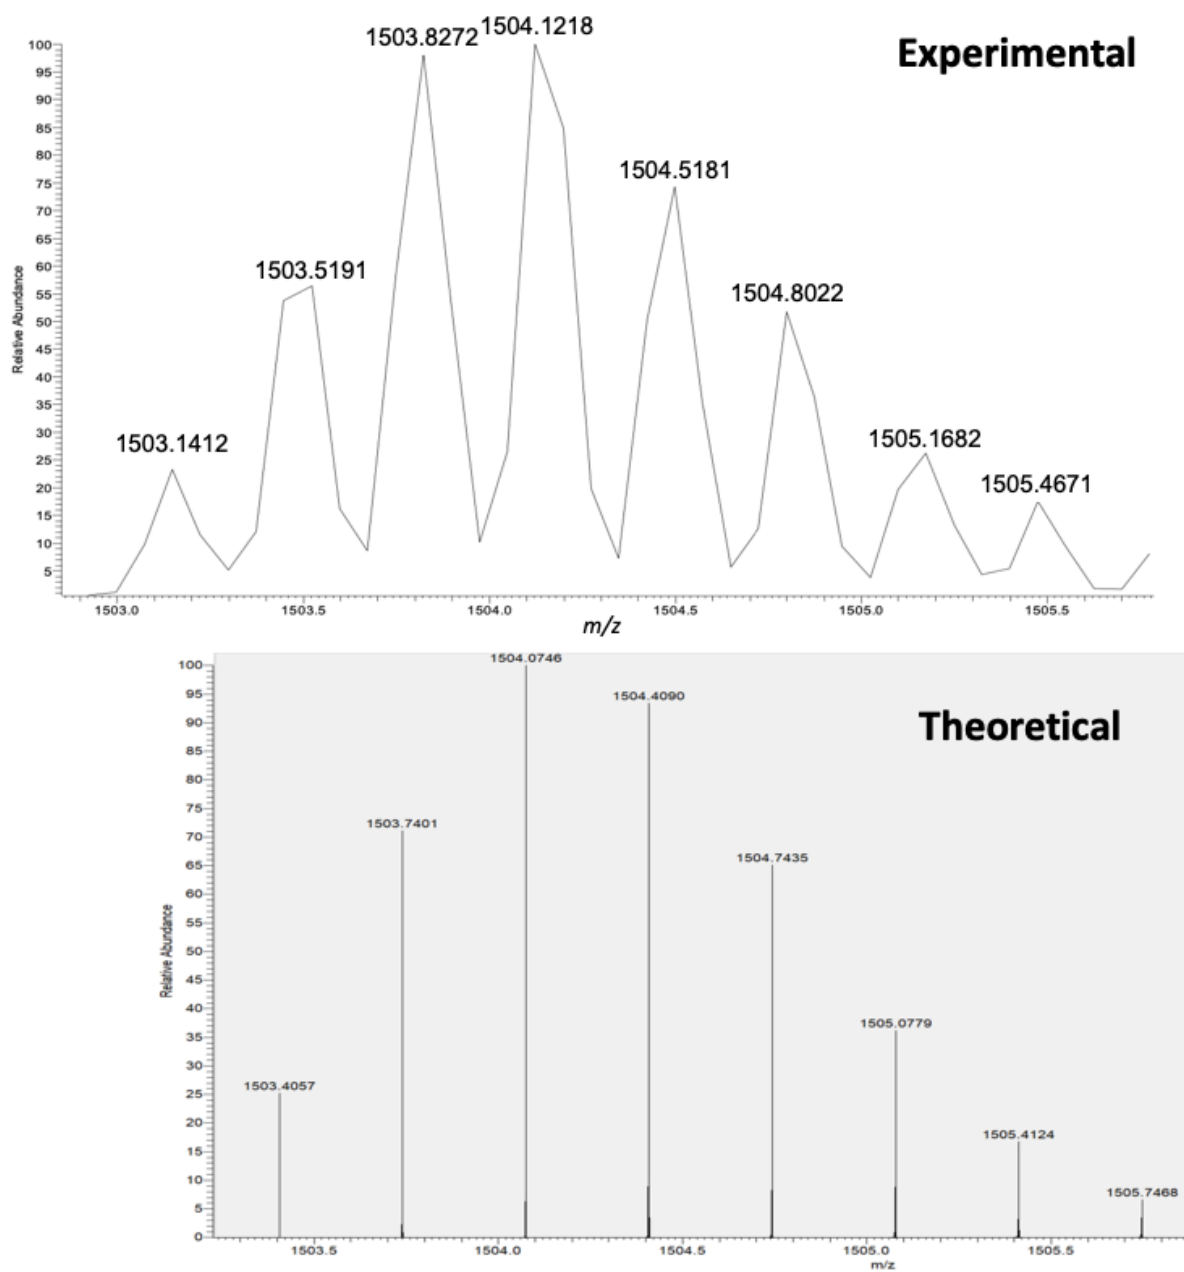

**Figure S7.** Expanded mass spectrum of the molecular ion signal of the G2 rotaxane dendron-OSu 4-3H·3PF<sub>6</sub> and comparison between the experimental result (top) and the theoretical analysis (bottom).
